# Supplementary material for: The internal anatomy of titanosaur osteoderms from the Upper Cretaceous of Spain is compatible with a role in oogenesis
Source: PubMed Central journal article supplement (PMC5294579; doi:10.1038/srep42035), 2017-02-07

**The internal anatomy of titanosaur osteoderms  
from the Upper Cretaceous of Spain is compatible  
with a role in oogenesis.**

**Daniel Vidal<sup>\*1,2</sup>, Francisco Ortega<sup>1</sup>, Francisco Gascó<sup>1</sup>, Alejandro Serrano Martínez<sup>1</sup> and  
José Luis Sanz<sup>2</sup>**

**1-** Grupo de Biología Evolutiva, UNED, Paseo Senda del Rey 9, 28040, Madrid (Spain)

**2 -** Unidad de Paleontología, Universidad Autónoma de Madrid, C/ Darwin 2 28049,  
Madrid (Spain)

**Supplementary Figure 1**

Supplementary Figure 1.- General cartography of the G1 excavation area at Lo Hueco. Lines mark recognized partial titanosaurian skeletons. Yellow spots mark eight osteoderms. Two missing osteoderms from the map were collected ex-situ in G1, and therefore their precise location could not be assessed. Black spots mark isolated skeletal elements. This cartography was generated using Autodesk AutoCAD 2014 (<http://www.autodesk.com/products/autocad/overview>), from geo-referenced points measured in the field and the original quarry cartography drawn during the excavation.

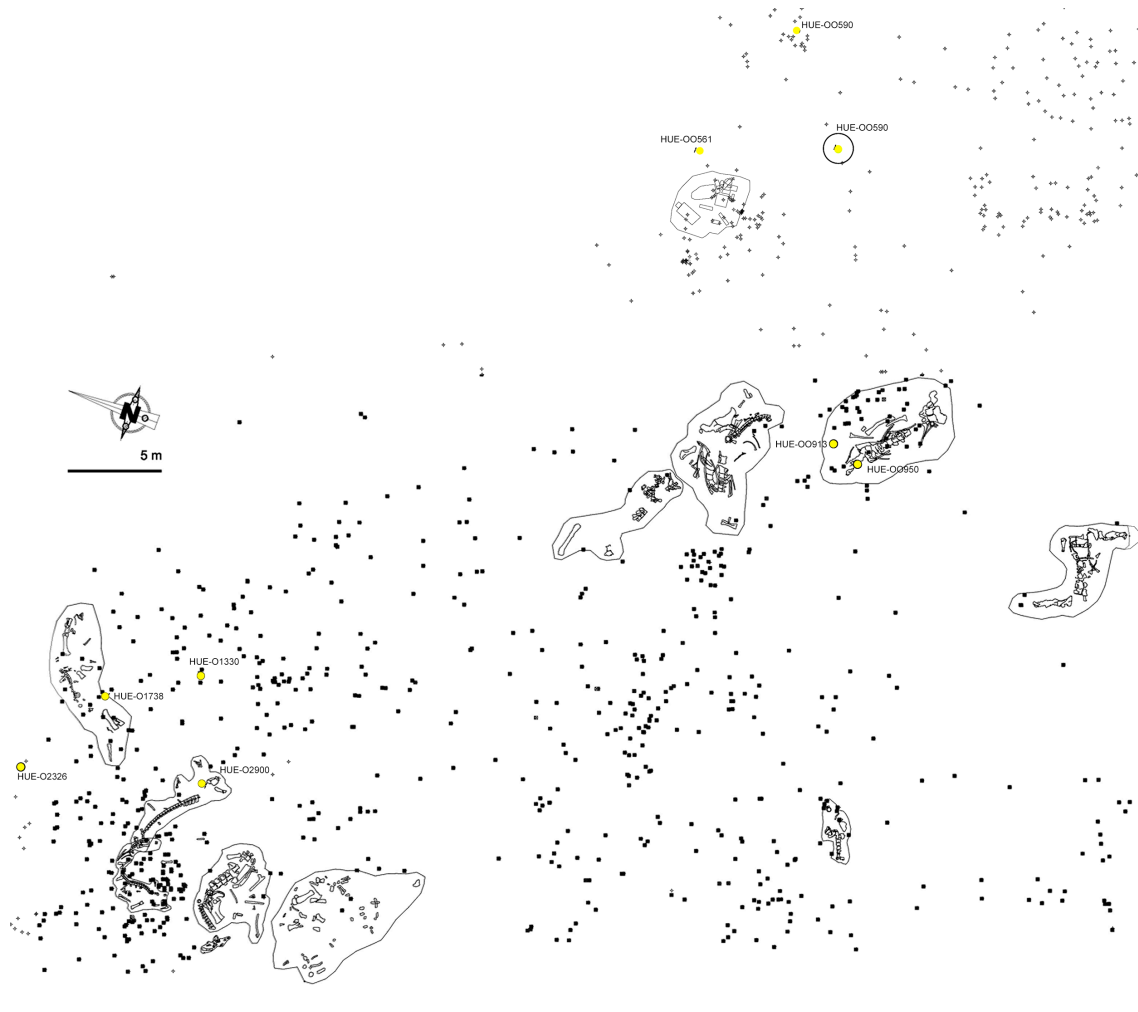

Supplement: srep42035-s1.pdf [file srep42035-s1.pdf]
